# Supplementary material
Source: HighWire-hosted journal article supplement (https://erj.ersjournals.com/content/60/2/2102951)
Supplement: inline-supplementary-material-2 [file inline-supplementary-material-2.pdf]

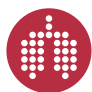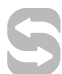

SHAREABLE PDF

# Pulmonary infection by SARS-CoV-2 induces senescence accompanied by an inflammatory phenotype in severe COVID-19: possible implications for viral mutagenesis

Konstantinos Evangelou<sup>1,17</sup>, Dimitris Veroutis<sup>1,2,17</sup>, Koralia Paschalaki<sup>3,17</sup>, Periklis G. Foukas<sup>4</sup>, Nefeli Lagopati<sup>1,2</sup>, Marios Dimitriou<sup>4,5</sup>, Angelos Papaspyropoulos<sup>1,2</sup>, Bindu Konda<sup>6</sup>, Orsalia Hazapis<sup>1</sup>, Aikaterini Polyzou<sup>1</sup>, Sophia Havaki<sup>1</sup>, Athanassios Kotsinas<sup>1</sup>, Christos Kittas<sup>1,7</sup>, Athanasios G. Tzioufas<sup>8</sup>, Laurence de Leval<sup>9</sup>, Demetris Vassilakos<sup>1</sup>, Sotirios Tsiodras<sup>10,11</sup>, Barry R. Stripp<sup>6</sup>, Argyris Papantonis<sup>12,13</sup>, Giovanni Blandino<sup>14</sup>, Ioannis Karakasiliotis<sup>5</sup>, Peter J. Barnes<sup>3,18</sup> and Vassilis G. Gorgoulis<sup>1,2,7,15,16,18</sup>

<sup>1</sup>Molecular Carcinogenesis Group, Dept of Histology and Embryology, Medical School, National and Kapodistrian University of Athens, Athens, Greece. <sup>2</sup>Biomedical Research Foundation, Academy of Athens, Athens, Greece. <sup>3</sup>National Heart and Lung Institute, Imperial College London, London, UK. <sup>4</sup>2nd Dept of Pathology, Attikon University Hospital, Medical School, National and Kapodistrian University of Athens, Athens, Greece. <sup>5</sup>Laboratory of Biology, Dept of Medicine, Democritus University of Thrace, Alexandroupolis, Greece. <sup>6</sup>Lung and Regenerative Medicine Institutes, Cedars-Sinai Medical Center, Los Angeles, CA, USA. <sup>7</sup>Faculty of Health and Medical Sciences, University of Surrey, Guildford, UK. <sup>8</sup>Dept of Pathophysiology, Medical School, National and Kapodistrian University of Athens, Athens, Greece. <sup>9</sup>Institute of Pathology, Lausanne University Hospital, Lausanne, Switzerland. <sup>10</sup>4th Dept of Internal Medicine, Attikon University Hospital, University of Athens Medical School, Athens, Greece. <sup>11</sup>Hellenic Centre for Disease Control and Prevention, Athens, Greece. <sup>12</sup>Translational Epigenetics Group, Institute of Pathology, University Medical Center Göttingen, Göttingen, Germany. <sup>13</sup>Center for Molecular Medicine, University of Cologne, Cologne, Germany. <sup>14</sup>Oncogenomic and Epigenetic Unit, IRCCS, Regina Elena National Cancer Institute, Rome, Italy. <sup>15</sup>Faculty Institute for Cancer Sciences, Manchester Academic Health Sciences Centre, University of Manchester, Manchester, UK. <sup>16</sup>Center for New Biotechnologies and Precision Medicine, Medical School, National and Kapodistrian University of Athens, Athens, Greece. <sup>17</sup>Contributed equally. <sup>18</sup>P.J. Barnes and V.G. Gorgoulis contributed equally to this article as lead authors and supervised the work.

Corresponding author: Vassilis G. Gorgoulis ([vgorg@med.uoa.gr](mailto:vgorg@med.uoa.gr))

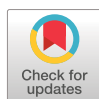

Shareable abstract (@ERSpublications)

In severe COVID-19, alveolar type 2 (AT2) cells infected by SARS-CoV-2 exhibit senescence accompanied by a proinflammatory phenotype, a molecular mechanism that may be important in persistence of disease (post-acute sequelae of COVID-19) and mutagenesis <https://bit.ly/3fnopg9>

**Cite this article as:** Evangelou K, Veroutis D, Paschalaki K, *et al.* Pulmonary infection by SARS-CoV-2 induces senescence accompanied by an inflammatory phenotype in severe COVID-19: possible implications for viral mutagenesis. *Eur Respir J* 2022; 60: 2102951 [DOI: 10.1183/13993003.02951-2021].

This single-page version can be shared freely online.

Copyright ©The authors 2022.

This version is distributed under the terms of the Creative Commons Attribution Licence 4.0.

This article has an editorial commentary:  
<https://doi.org/10.1183/13993003.01101-2022>

Received: 27 Aug 2021  
Accepted: 24 Dec 2021

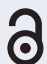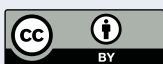

## Abstract

**Background** Severe acute respiratory syndrome coronavirus 2 (SARS-CoV-2) infection of the respiratory system can progress to a multisystemic disease with aberrant inflammatory response. Cellular senescence promotes chronic inflammation, named senescence-associated secretory phenotype (SASP). We investigated whether coronavirus disease 2019 (COVID-19) is associated with cellular senescence and SASP.

**Methods** Autopsy lung tissue samples from 11 COVID-19 patients and 43 age-matched non-COVID-19 controls with similar comorbidities were analysed by immunohistochemistry for SARS-CoV-2, markers of senescence and key SASP cytokines. Virally induced senescence was functionally recapitulated *in vitro*, by infecting epithelial Vero-E6 cells and a three-dimensional alveosphere system of alveolar type 2 (AT2) cells with SARS-CoV-2 strains isolated from COVID-19 patients.

**Results** SARS-CoV-2 was detected by immunocytochemistry and electron microscopy predominantly in AT2 cells. Infected AT2 cells expressed angiotensin-converting enzyme 2 and exhibited increased senescence (p16<sup>INK4A</sup> and SenTraGor positivity) and interleukin (IL)-1 $\beta$  and IL-6 expression. *In vitro*, infection of Vero-E6 cells with SARS-CoV-2 induced senescence (SenTraGor), DNA damage ( $\gamma$ -H2AX) and increased cytokine (IL-1 $\beta$ , IL-6, CXCL8) and apolipoprotein B mRNA-editing (APOBEC) enzyme

expression. Next-generation sequencing analysis of progenies obtained from infected/senescent Vero-E6 cells demonstrated APOBEC-mediated SARS-CoV-2 mutations. Dissemination of the SARS-CoV-2 infection and senescence was confirmed in extrapulmonary sites (kidney and liver) of a COVID-19 patient.

**Conclusions** We demonstrate that in severe COVID-19, AT2 cells infected by SARS-CoV-2 exhibit senescence and a proinflammatory phenotype. *In vitro*, SARS-CoV-2 infection induces senescence and inflammation. Importantly, infected senescent cells may act as a source of SARS-CoV-2 mutagenesis mediated by APOBEC enzymes. Therefore, SARS-CoV-2-induced senescence may be an important molecular mechanism of severe COVID-19, disease persistence and mutagenesis.
